# Supplementary material for: Identification of Molecular Mechanisms Responsible for the MMP-9-1562C/T Dependent Differential Regulation of Matrix Metalloproteinase-9 Expression in Human Neurons
Source: Preprints.org preprint supplement (doi:10.20944/preprints202309.2152.v1), 2023-09-30
Supplement: Supplementary file 3 [file supplementary]

| **Name of oligonucleotide probe** | **Sequence** |
| --- | --- |
| allelCbiotin | 5’Biotin-CAG GCG TGG TGG CGC ACG CCT ATA ATA CCA GCT3’ |
| allelCcomplementary | 5’AGC TGG TAT TAT AGG CGT GCG CCA CCA CGC CTG3’ |
| allelTbiotin | 5’Biotin-CAG GCG TGG TGG CGC ATG CCT ATA ATA CCA GCT3' |
| polimTcomplementary | 5’ AGC TGG TAT TAT AGG CAT GCG CCA CCA CGC CTG3’ |
| allelC | 5’CAG GCG TGG TGG CGC ACG CCT ATA ATA CCA GCT3' |
| allelT | 5’CAG GCG TGG TGG CGC ATG CCT ATA ATA CCA GCT3' |

**Supplementary Table 1.** Name and sequence of oligonucleotide probe used for EMSA, EMSA *supershift*, and pull-down with mass-spectrometry.

| **Primers** | **PCR conditions** |
| --- | --- |
| F: 5’- CACCATCCGTTGCGGACTTAC-3’ | 45 cycles of 95°c for 10 sec, 60°C for 15 sec,  and 72°C for 15 sec |
| R: 5’- CCTCGGGCAAATGTCTTACCAC-3’ |
| F: 5’- GTGATGATGAACCAGGTTATGACC-3’ | 45 cycles of 95°c for 10 sec, 64°C for 15 sec,  and 72°C for 15 sec |
| R: 5’- CATCTCCTTCATCACATCTCGAGC-3’ |
| F: 5’- CATCGCTGTGAATTGGGCTGG-3’ | 45 cycles of 95°c for 10 sec, 60°C for 15 sec,  and 72°C for 15 sec |
| R: 5’- CCT CTG GTG ATA CTT TAG CAG TTC-3’ |
| F: 5’- ’CGACCCTAACCGAGGAAGGAG-3’ | 45 cycles of 95°c for 10 sec, 60°C for 15 sec,  and 72°C for 15 sec |
| R: 5’- GGTC TTG CCG TCT TTC TGA TGG TC-3’ |

**Supplementary Table 2.** Primer sequences used for RT-qPCR as well as applied PCR conditions.
